# Supplementary material
Source: publisher figshare collection journal article supplement (https://f1000.figshare.com/articles/dataset/_/155788)
Supplement: Supplementary file 1 [file 1]

**Explanation of column headers and codes:**

day - day of the assay

strain - identity of the *Synura* strain ( LB239, LB2403, LB2405, LB2406,CBS)

rep - numbered replicate identifier

logfreecelldens - log10 transformed *Synura* total free cell density (per mL)

logcoldens - log10 transformed density of *Synura* colonies (per mL)
